# Supplementary material
Source: Springer Nature journal article supplement (https://www.springermedizin.de/resource/supplementary/12936_2012_2605_MOESM4_ESM.pdf/9543276)

Red cells remaining (%)

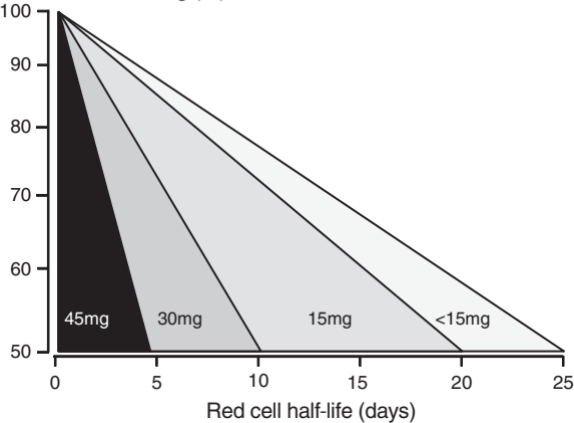

45mg

30mg

15mg

<15mg

Red cell half-life (days)

Supplement: MOESM4 [file 9543276]
